# Supplementary material for: Structural validity and internal consistency of an outcome measure to assess self-reported educator capacity to support children with motor difficulties
Source: Frontiers journal article supplement (doi:10.3389/feduc.2023.1174097), 2023-10-10
Supplement: Image_1.PDF [file Image_1.PDF]

## Partnering for Change (P4C) Educator Questionnaire

*Helping by understanding*

How confident are you...

|                                                                                                 |   |   |   |                       |
|-------------------------------------------------------------------------------------------------|---|---|---|-----------------------|
| 1 ... in your knowledge about the expectations for typical motor development at different ages? |   |   |   |                       |
| <i>Not at all confident</i>                                                                     |   |   |   | <i>Very confident</i> |
| 1                                                                                               | 2 | 3 | 4 | 5                     |
| 2 ... that you can recognize when a student is showing signs of having motor difficulty?        |   |   |   |                       |
| <i>Not at all confident</i>                                                                     |   |   |   | <i>Very confident</i> |
| 1                                                                                               | 2 | 3 | 4 | 5                     |
| 3 ... in your knowledge about the expectations for typical motor development at different ages? |   |   |   |                       |
| <i>Not at all confident</i>                                                                     |   |   |   | <i>Very confident</i> |
| 1                                                                                               | 2 | 3 | 4 | 5                     |
|                                                                                                 |   |   |   | Subscale 1 total      |

*Modifying the task*

How confident are you in your ability to...

|                                                                                                    |   |   |   |                       |
|----------------------------------------------------------------------------------------------------|---|---|---|-----------------------|
| 4 ... determine the chair and/or desk height needed to maximize a student's posture and stability? |   |   |   |                       |
| <i>Not at all confident</i>                                                                        |   |   |   | <i>Very confident</i> |
| 1                                                                                                  | 2 | 3 | 4 | 5                     |
| 5 ... use mats or cushions on the student's chair?                                                 |   |   |   |                       |
| <i>Not at all confident</i>                                                                        |   |   |   | <i>Very confident</i> |
| 1                                                                                                  | 2 | 3 | 4 | 5                     |

|                                                                              |   |   |   |                       |
|------------------------------------------------------------------------------|---|---|---|-----------------------|
| 6 ... provide angled surfaces for writing?                                   |   |   |   |                       |
| <i>Not at all confident</i>                                                  |   |   |   | <i>Very confident</i> |
| 1                                                                            | 2 | 3 | 4 | 5                     |
| 7 ... experiment with different types of writing tools?                      |   |   |   |                       |
| <i>Not at all confident</i>                                                  |   |   |   | <i>Very confident</i> |
| 1                                                                            | 2 | 3 | 4 | 5                     |
| 8 ... adjust the type of paper a student uses?                               |   |   |   |                       |
| <i>Not at all confident</i>                                                  |   |   |   | <i>Very confident</i> |
| 1                                                                            | 2 | 3 | 4 | 5                     |
| 9 ... use alternate types of scissors?                                       |   |   |   |                       |
| <i>Not at all confident</i>                                                  |   |   |   | <i>Very confident</i> |
| 1                                                                            | 2 | 3 | 4 | 5                     |
| 10 ... provide computer access as an alternative to printing or handwriting? |   |   |   |                       |
| <i>Not at all confident</i>                                                  |   |   |   | <i>Very confident</i> |
| 1                                                                            | 2 | 3 | 4 | 5                     |
| Subscale 2 total                                                             |   |   |   |                       |

*Altering expectations and teaching strategies*

How confident are you in your ability to...

|                                                                                   |   |   |   |                       |
|-----------------------------------------------------------------------------------|---|---|---|-----------------------|
| 11 ... use verbal instructions to “coach” students through a motor task?          |   |   |   |                       |
| <i>Not at all confident</i>                                                       |   |   |   | <i>Very confident</i> |
| 1                                                                                 | 2 | 3 | 4 | 5                     |
| 12 ... alter the motor demands of tasks to prevent fatigue or make a task easier? |   |   |   |                       |
| <i>Not at all confident</i>                                                       |   |   |   | <i>Very confident</i> |
| 1                                                                                 | 2 | 3 | 4 | 5                     |

|                                                                                                              |   |   |   |                       |
|--------------------------------------------------------------------------------------------------------------|---|---|---|-----------------------|
| 13 ... provide suggestions to parents about ways they can adapt clothing to ease dressing?                   |   |   |   |                       |
| <i>Not at all confident</i>                                                                                  |   |   |   | <i>Very confident</i> |
| 1                                                                                                            | 2 | 3 | 4 | 5                     |
| 14 ... provide suggestions to parents about selecting lunch and snack containers to facilitate independence? |   |   |   |                       |
| <i>Not at all confident</i>                                                                                  |   |   |   | <i>Very confident</i> |
| 1                                                                                                            | 2 | 3 | 4 | 5                     |
| 15 ... adapt physical education activities by modifying instructions?                                        |   |   |   |                       |
| <i>Not at all confident</i>                                                                                  |   |   |   | <i>Very confident</i> |
| 1                                                                                                            | 2 | 3 | 4 | 5                     |
| 16 ... adapt physical education activities by modifying equipment?                                           |   |   |   |                       |
| <i>Not at all confident</i>                                                                                  |   |   |   | <i>Very confident</i> |
| 1                                                                                                            | 2 | 3 | 4 | 5                     |
| 17 ... provide recess activities that facilitate the student's participation with peers?                     |   |   |   |                       |
| <i>Not at all confident</i>                                                                                  |   |   |   | <i>Very confident</i> |
| 1                                                                                                            | 2 | 3 | 4 | 5                     |

Subscale 3 total

Subscale 1 total

Subscale 2 total

Subscale 3 total

P4C Educator Questionnaire total
